# Supplementary material
Source: MDPI journal article supplement (https://www.mdpi.com/2073-4352/13/12/1667)
Supplement: s1 [file s1]

## Supplementary Materials

### An Alternative to Chlorobenzene as a HTM solvent for High Performance Perovskite Solar Cells

Seung Ho Lee <sup>1,†</sup>, Seong Bin Lim <sup>2,†</sup>, Jin Young Kim <sup>1</sup>, Seri Lee <sup>2</sup>, Se Young Oh <sup>2,\*</sup> and Gyu Min Kim <sup>1,\*</sup>

<sup>1</sup>Faculty of Food Biotechnology and Chemical Engineering, Hankyong National University, Anseong, Gyeonggi-Do 17579, Republic of Korea

<sup>2</sup>Department of Chemical and Biomolecular Engineering, Sogang University, Seoul 04107, Republic of Korea

\*Correspondence: syoh@sogang.ac.kr; gyumin@hknu.ac.kr

†Seung Ho Lee and Seong Bin Lim contributed equally to this work.

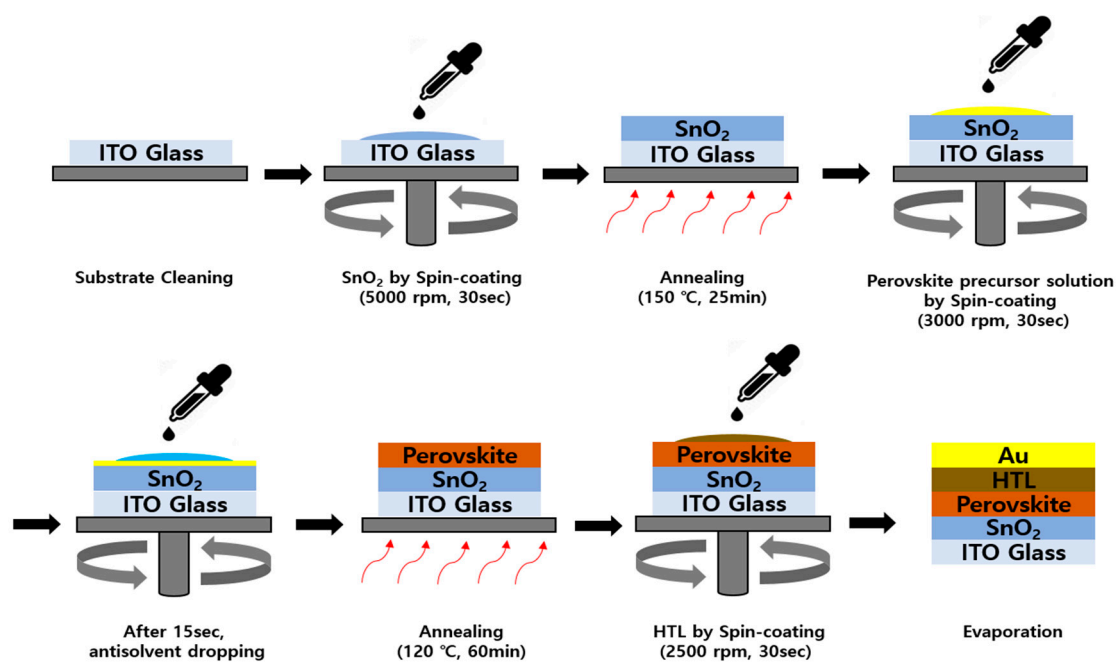

Figure S1. PSCs fabrication process

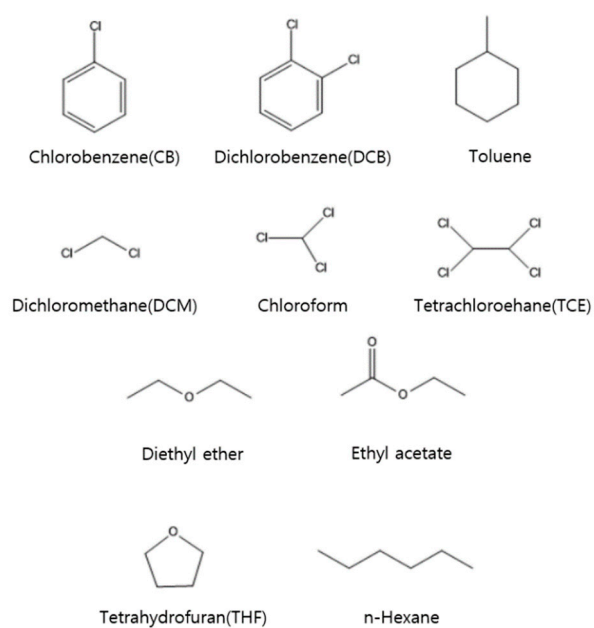

**Figure S2.** Chemical structure of the solvent.

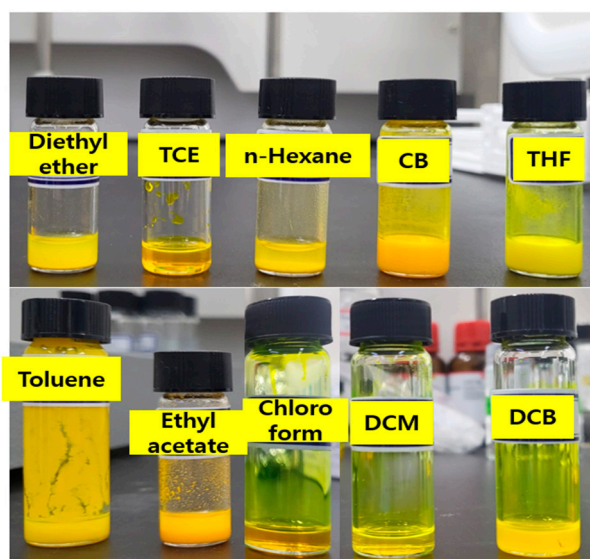

**Figure S3.** Appearance of TOP-HTM- $\alpha$ 2 after dissolving the solvent.

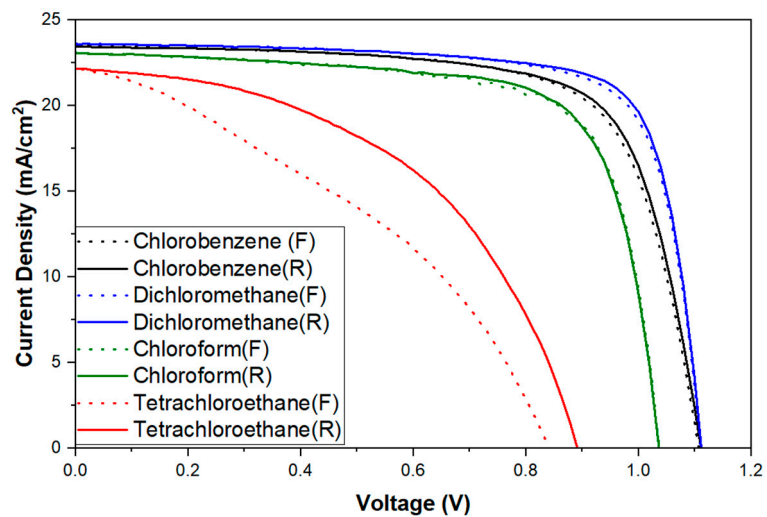

**Figure S4.** Density-voltage characteristic of PSCs using TOP-HTM- $\alpha$ 2 with different solvents.

**Table S1.** Summary of detailed performance parameters of PSCs.

| Sample            | $J_{sc}$ (mA/cm <sup>2</sup> ) | $V_{oc}$ (V) | FF (%) | PCE (%) |
|-------------------|--------------------------------|--------------|--------|---------|
| Chlorobenzene     | 23.42                          | 1.110        | 71.77  | 18.67   |
| Dichloromethane   | 23.58                          | 1.111        | 76.97  | 20.18   |
| Chloroform        | 23.33                          | 1.039        | 72.31  | 17.26   |
| Tetrachloroethane | 22.15                          | 0.891        | 49.32  | 9.72    |

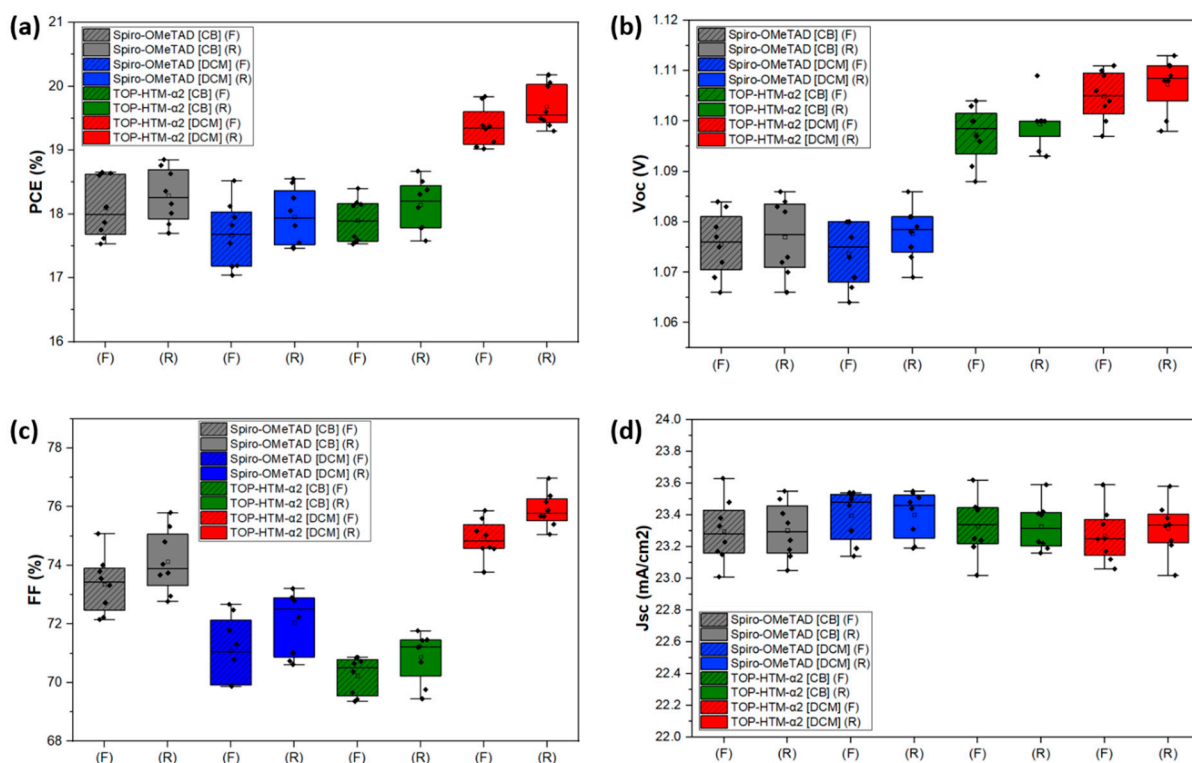

**Figure S5.** Box plot: (a) PCE, (b) Voc, (c) FF, and (d) Jsc for PSCs

**Table S2.** Summary of detailed performance parameters of PSCs.

| Sample                    |         | J <sub>sc</sub> (mA/cm <sup>2</sup> ) | V <sub>oc</sub> (V)     | FF (%)                | PCE (%)               |
|---------------------------|---------|---------------------------------------|-------------------------|-----------------------|-----------------------|
| Spiro-OMeTAD [CB]         | Foward  | 23.30±0.00019<br>(23.38)              | 1.076±0.0062<br>(1.084) | 73.35±0.98<br>(73.55) | 18.10±0.47<br>(18.65) |
|                           | Reverse | 23.30±0.00017<br>(23.41)              | 1.077±0.0076<br>(1.086) | 74.14±1.08<br>(75.06) | 18.29±0.43<br>(18.85) |
| Spiro-OMeTAD [DCM]        | Foward  | 23.40±0.00016<br>(23.54)              | 1.074±0.0066<br>(1.077) | 71.06±1.19<br>(72.48) | 17.67±0.52<br>(18.52) |
|                           | Reverse | 23.40±0.00015<br>(23.54)              | 1.078±0.0053<br>(1.081) | 72.05±1.08<br>(72.88) | 17.96±0.44<br>(18.55) |
| TOP-HTM- $\alpha$ 2 [CB]  | Foward  | 23.33±0.00018<br>(23.44)              | 1.098±0.0062<br>(1.097) | 70.25±0.65<br>(70.87) | 17.90±0.35<br>(18.40) |
|                           | Reverse | 23.33±0.00015<br>(23.42)              | 1.100±0.0049<br>(1.100) | 70.88±0.84<br>(71.77) | 18.14±0.39<br>(18.67) |
| TOP-HTM- $\alpha$ 2 [DCM] | Foward  | 23.27±0.00017<br>(23.58)              | 1.105±0.0049<br>(1.110) | 74.89±0.68<br>(75.60) | 19.37±0.31<br>(19.81) |
|                           | Reverse | 23.32±0.00016<br>(23.58)              | 1.007±0.0052<br>(1.111) | 75.90±0.59<br>(76.97) | 19.69±0.34<br>(20.18) |
